# Supplementary material for: Development of multiplexed analysis for the photocatalytic activities of nanoparticles in aqueous suspension
Source: Royal Society of Chemistry journal article supplement (doi:10.1039/c1pp05244f), 2011-10-17
Supplement: c1pp05244f.pdf [file c1pp05244f.pdf]

# Development of Multiplexed Analysis for the Photocatalytic

## Activities of Nanoparticles in Aqueous Suspension

No Ah Lee<sup>a,c</sup>, Soo Jin Kim<sup>a</sup>, Bong-Jae Park<sup>a</sup>, Hyun Min Park<sup>b</sup>, Minjoong Yoon<sup>\*c</sup>,  
Bong Hyun Chung<sup>d</sup> and Nam Woong Song<sup>\*a</sup>

<sup>a</sup>Center for Nanobio Convergence, Korea Research Institute of Standards and Science, 209  
Gajeong-Ro, Yuseong-Gu, Daejeon 305-340, Rep. of Korea

<sup>b</sup>Center for Nano-Characterization, Korea Research Institute of Standards and Science,  
Daejeon 305-340, South Korea

<sup>c</sup>Molecular/Nano Photochemistry & Photonics Lab., Department of Chemistry, Chungnam  
National University, 99 Daehak-Ro, Yuseong-Gu, Daejeon 305-764, Korea

<sup>d</sup>BioNanotechnology Research Center, Korea Research Institute of Bioscience and  
Biotechnology and Nanobiotechnology Major School of Engineering, University of Science  
and Technology 111 Gwahang-Ro, Yuseong-Gu, Daejeon 305-806, Korea

\*Corresponding authors:

*Nam Woong Song, Ph.D.*

*e-mail: [nwsong@kriss.re.kr](mailto:nwsong@kriss.re.kr), Tel: +82-42-868-5214, Fax: +82-42-868-5032*

*Minjoong Yoon, Ph.D.*

*e-mail: [mjyoon@cnu.ac.kr](mailto:mjyoon@cnu.ac.kr), Tel: +82-42-821-6546, Fax: +82-42-821-8896*

-----

## Supporting Information

-----

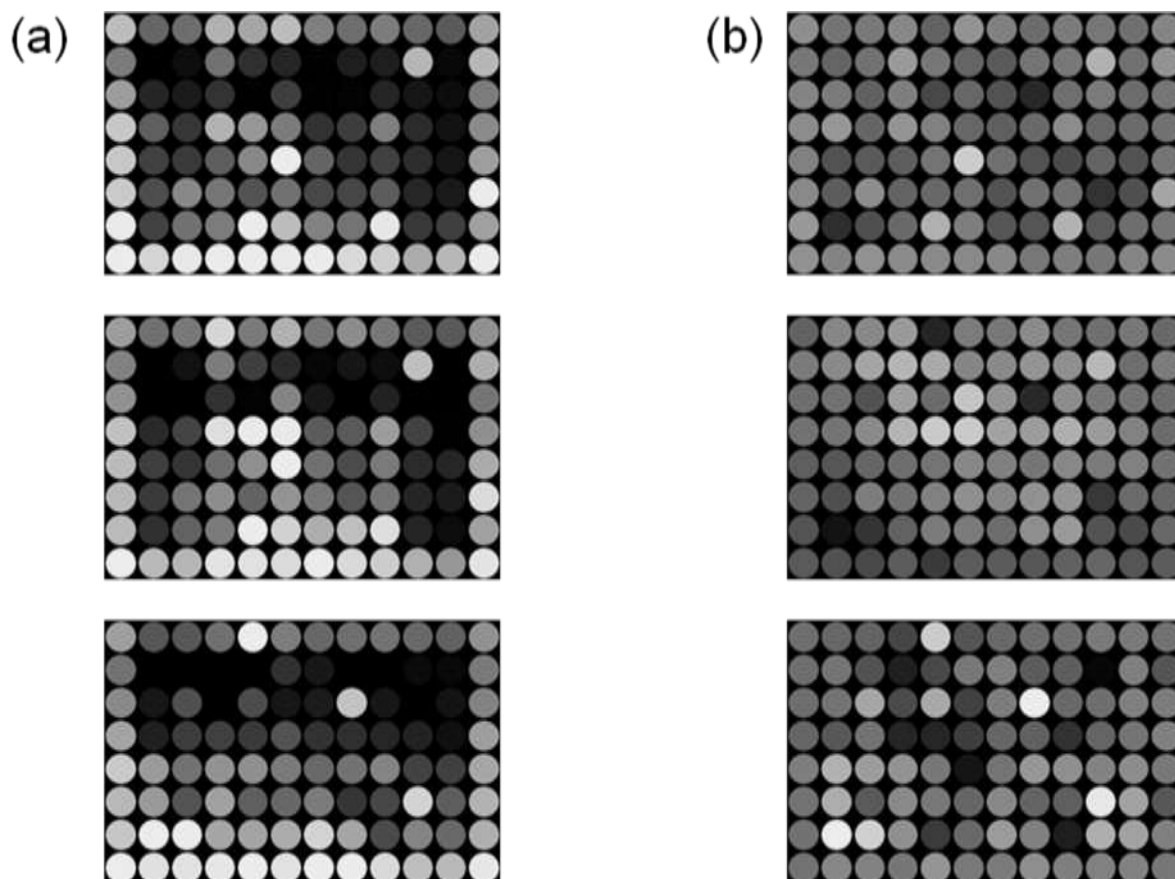

27

28

29 **Fig. S1.** (a)  $k_{app}$  values of NADH in each well depicted as a contrast image observed from  
30 three independent plates. (A brighter circle corresponds to the well with higher rate constant)  
31 (b) The reconstructed contrast image of the  $k_{app}$ 's corresponding to the images in the left  
32 column. – Images in the first row are the same ones as in Fig. 2 in the main text.

33

## 34 ***S1. Experimental Parts***

### 35 ***S1.1 Materials***

36 TiO<sub>2</sub> as the photocatalytic nanomaterial was purchased from Evonic Co. LTD. (Aeroxide  
37 Degussa P25<sup>®</sup>) and was used without further purification. To obtain a stable suspension of  
38 TiO<sub>2</sub> NPs, 40 mg of TiO<sub>2</sub> powder was mixed into 10 mL of an aqueous NaOH (S8045, >98%,  
39 Sigma-Aldrich) solution of pH 10 stored in a 20-mL glass vial ( $\phi = 26$  mm). The solution was  
40 stirred using a 22-mm magnetic bar at 900 rpm for 24 h and the suspension was maintained  
41 for an additional 24 h without stirring to sediment large particles. Then 5 mL of the  
42 supernatant was sampled for further analysis. The concentration of the TiO<sub>2</sub> NP suspension

43 was determined as 2.1 g/L by measuring the weight of the 1 mL of the suspension after  
44 dehydration and comparing the UV absorbance at 310 nm with that of highly concentrated  
45 suspensions. The hydrodynamic diameter of TiO<sub>2</sub> NPs in suspension was measured as 160 ~  
46 190 nm using a particle size analyzer (ELS-Z, Otsuka electronics Co. Ltd.)

47 The stock solution of NADH for the PCA probe was prepared by dissolving 33 mg of  
48 NADH (Cat. No. 43423 Fluka. Co. LTD.) into 10 mL of deionized water (DIW > 18 MΩ·cm<sup>-1</sup>  
49 <sup>1</sup>) obtained from the Milli-Q reference water system production unit (Millipore Co.). The  
50 solution was then diluted by a factor of 5 ~ 80 to adjust the concentration adequately for the  
51 experimental condition.

52 Acetic acid/sodium acetate, sodium phosphate monobasic/sodium phosphate dibasic  
53 and sodium carbonate/sodium bicarbonate solutions of equal concentration were used for the  
54 preparation of pH buffers of pH 5 ~ 6, pH 6 ~ 8 and pH 9 ~ 11, respectively. All of the  
55 reagents for the preparation of pH buffers were purchased from Sigma-Aldrich as ACS  
56 reagent grade.

57

### 58 ***S1.2 Spectral Measurement procedure***

59 Absorbance spectra of the TiO<sub>2</sub> suspension and NADH solution were recorded in the  
60 wavelength range between 200 and 500 nm using a small-volume (100 μL) absorbance  
61 cuvette (Hellma 105.201-QS) and a spectrophotometer (UV-1700, Shimadzu). The  
62 fluorescence spectrum measurement of the NADH solution was carried out using a scanning-  
63 type spectrofluorometer (Shimadzu RF-5301PC) with a small volume (100 μL) sample  
64 cuvette (Hellma 105.250-QS).

65

### 66 ***S2. Dependence of NADH fluorescence intensity on NADH and TiO<sub>2</sub> concentrations***

67 To measure the oxidation rate of NADH by observing the fluorescence intensity, the

68 experiment should be performed in a concentration range exhibiting linear dependence of the  
69 fluorescence intensity. The concentration dependence of the fluorescence intensity differs  
70 according to the optical measurement geometry.<sup>1</sup> In this study, the top-read mode of  
71 fluorescence microplate reader was used, which entail both excitation and detection of the  
72 fluorescence through optical fibers located above a 96-well plate. In this optical geometry, the  
73 fluorescence intensity of NADH showed a linear dependence on NADH concentration up to  
74 250  $\mu\text{M}$  with a coefficient of determination close to 1 ( $R^2 = 0.995$ ) (Table S1 and Fig. S2(a)).  
75 The fluorescence intensity exhibited saturation behaviour when the concentration was  
76 increased over 125  $\mu\text{M}$ . Similar dependence of the NADH fluorescence intensity on the  
77 concentration could be observed in the presence of  $\text{TiO}_2$  NPs (Table S1 and Fig. S2(b)). Such  
78 behaviour is due to the absorption of excitation light in the direction of propagation. Because  
79 the conjugate focal point of the detection fiber input lies at a certain depth within the NADH  
80 solution, the excitation light reaching that point is more attenuated by the absorption of  
81 NADH as the concentration increases. Based on these results, the maximum concentration of  
82 NADH was set to 125  $\mu\text{M}$ .

83

84 **Table S1** Fluorescence intensities of NADH observed at various concentrations of NADH  
85 and  $\text{TiO}_2$  NPs

| [NADH] ( $\mu\text{M}$ ) | [ $\text{TiO}_2$ ] (mg/L) |       |       |       |       |       |
|--------------------------|---------------------------|-------|-------|-------|-------|-------|
|                          | 0                         | 16    | 31.3  | 62.5  | 125   | 250   |
| 7.82                     | 212.0                     | 186.8 | 169.3 | 139.8 | 106.8 | 78.75 |
| 15.6                     | 326.6                     | 294.3 | 272.3 | 239.1 | 193.8 | 148.4 |
| 31.3                     | 556.3                     | 509.8 | 479.7 | 428.9 | 364.1 | 285.1 |
| 62.5                     | 931.4                     | 869.8 | 837.3 | 758.8 | 654.6 | 535.1 |
| 125                      | 1,510                     | 1,428 | 1,391 | 1,284 | 1,130 | 958.5 |
| 250                      | 2,276                     | 2,186 | 2,145 | 2,026 | 1,785 | 1,558 |
| 500                      | 2,919                     | 2,877 | 2,848 | 2,741 | 2,572 | 2,353 |
| 1,000                    | 3,366                     | 3,337 | 3,342 | 3,305 | 3,228 | 3,071 |

86 \* pH value was adjusted to 8 with 5 mM phosphate buffer

87

88

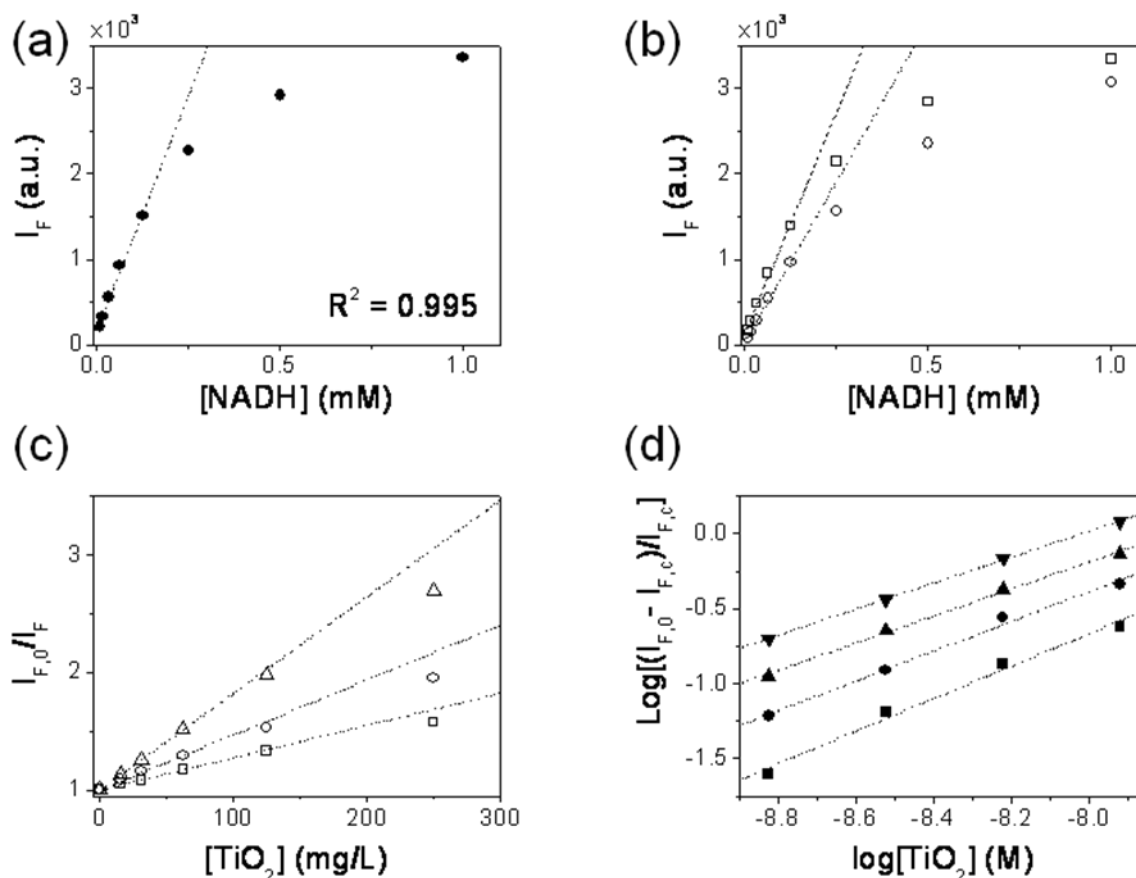

89

90 **Fig. S2.** (a) The dependence of fluorescence intensity on NADH concentration in the absence  
 91 of TiO<sub>2</sub> NPs. (b) The dependence of the NADH fluorescence intensity on NADH  
 92 concentration in the presence of TiO<sub>2</sub> NPs of ( $\square$ ) 31.3 and ( $\circ$ ) 250 mg/L. (c) The dependence  
 93 of NADH fluorescence intensity on the concentration of TiO<sub>2</sub> NPs with NADH concentration  
 94 of ( $\square$ ) 125, ( $\circ$ ) 31.3 and ( $\triangle$ ) 7.82  $\mu$ M. (d) The plot of  $\text{log} [(I_{F,0} - I_{F,c})/I_{F,c}]$  vs.  $\text{log} [\text{TiO}_2]$ . ( $I_{F,0}$ :  $I_F$   
 95 w/o TiO<sub>2</sub>;  $I_{F,c}$ :  $I_F$  at TiO<sub>2</sub> concentration of c with  $I_F$ ; NADH fluorescence intensity at 460 nm).  
 96

97 The presence of TiO<sub>2</sub> NPs in solution resulted in a decrease of NADH fluorescence  
 98 intensity, most likely due to charge transfer quenching from the photoexcited NADH to the  
 99 TiO<sub>2</sub> NP surface.<sup>2, 3</sup> Because the fluorescence intensity of the NADH/TiO<sub>2</sub> suspension was  
 100 constant over time without UV irradiation, the reduction in fluorescence intensity after the  
 101 addition of TiO<sub>2</sub> NPs could not be due to the catalytic decomposition of NADH in the dark.  
 102 The Stern-Volmer plot of the NADH fluorescence intensity vs. TiO<sub>2</sub> concentration showed a  
 103 linear relationship when the TiO<sub>2</sub> was present in the concentration range of 3.9 ~ 62.5 mg/L

104 (Fig. S2(c)). Negative deviations from the linear regression line were observed when the TiO<sub>2</sub>  
105 concentration was increased above 62.5 mg/L. Such behaviour is usually observed when the  
106 fluorescence quenching is accompanied by quencher binding.<sup>3,4</sup> In this case, it is possible to  
107 deduce the binding constant of NADH to the TiO<sub>2</sub> surface from the intercept of the linear  
108 regression as  $K_a \sim 2.5 \times 10^7 \text{ M}^{-1}$  according to Eqn (S1) (Fig. S2(d)).<sup>3</sup>

$$109 \quad \log \left[ \frac{I_{F,0} - I_{F,c}}{I_{F,c}} \right] = \log K_a + n \log [\text{TiO}_2] \quad (\text{S1})$$

110

### 111 ***S3. Dependence of the NADH photo-oxidation rate on NADH and TiO<sub>2</sub> concentrations***

112 The dependence of the NADH photo-oxidation rate on the TiO<sub>2</sub> concentration at various  
113 NADH concentrations has been summarized in Table S2 and Fig. S3(a). The apparent rate  
114 constant,  $k_{app}$ , could be obtained from the linear regression for the relative fluorescence  
115 intensity vs. UV irradiation time. The  $k_{app}$  values were linearly dependent on the TiO<sub>2</sub>  
116 concentration in the range of 3.9 ~ 31.3 mg/L regardless of the NADH concentration in the  
117 range of 31 ~ 250 μM. When the TiO<sub>2</sub> concentration was lower than 3.9 mg/L, the PCA of  
118 suspended TiO<sub>2</sub> NP was too small to allow observation of the reaction rate with low relative  
119 uncertainty. On the other hand, when the TiO<sub>2</sub> concentration was higher than 31.3 mg/L,  
120 saturation behaviour was observed due to the absorption and scattering of UV light by TiO<sub>2</sub>  
121 NPs. To obtain consistent PCA values, the measurement should be performed under the  
122 experimental conditions that show linear dependence of  $k_{app}$  values on the TiO<sub>2</sub> concentration.  
123 In our experiment,  $k_{app}$  values showed linear dependence on the TiO<sub>2</sub> concentration when  
124 TiO<sub>2</sub> suspension was prepared with a transmittance between  $3.2 \times 10^{-2}$  and 0.72 (0.15 ~ 1.5 in  
125 optical density) at 312 nm measured using a cell with 1-cm path length.

126

127

128 **Table S2** Photo-oxidation rate constant ( $k_{app}$ )<sup>a</sup> of NADH in the presence of TiO<sub>2</sub> NPs

| [TiO <sub>2</sub> ] (mg/L) | [NADH] (μM) |      |      |      |
|----------------------------|-------------|------|------|------|
|                            | 31.3        | 62.5 | 125  | 250  |
| 1.96                       | 0.05        | 0.27 | 0.93 | 1.96 |
| 2.61                       | 0.13        | 0.31 | 1.29 | 2.04 |
| 3.91                       | 0.51        | 0.84 | 1.32 | 2.41 |
| 5.21                       | 1.30        | 1.15 | 1.96 | 3.30 |
| 7.82                       | 1.61        | 2.34 | 2.89 | 4.08 |
| 15.7                       | 3.80        | 4.68 | 6.53 | 7.24 |
| 31.3                       | 6.17        | 7.87 | 11.6 | 13.0 |
| 62.5                       | 8.40        | 11.2 | 13.7 | 17.7 |
| 125                        | 7.92        | 14.2 | 15.1 | 21.0 |

129 <sup>a</sup> The unit of  $k_{app}$  is μM/min.

130 \* pH value was adjusted to 8 with 5 mM phosphate buffer

131

132

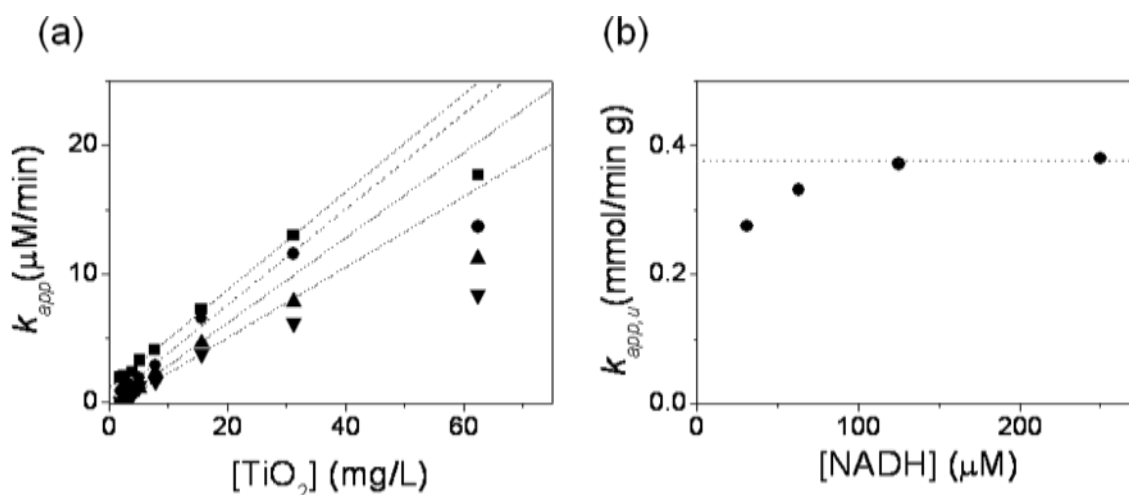

133

134 **Fig. S3.** (a) The dependence of  $k_{app}$  values on TiO<sub>2</sub> concentration. The concentration of  
135 NADH was (■) 250, (●) 125, (▲) 62.5 and (▼) 31.3 μM, respectively. (b) The dependence  
136 of the TiO<sub>2</sub>-normalized apparent rate constant on the NADH concentration.

137

138 The slope in the linear range of  $k_{app}$  vs. TiO<sub>2</sub> concentration gives the normalized value  
139 of the apparent reaction rate constant,  $k_{app,u}$ , with respect to TiO<sub>2</sub> concentration. As shown in  
140 Fig. S3(b), the value of  $k_{app,u}$  changed with the concentration of NADH.

141 An increase of *ca.* 35% in  $k_{app,u}$  value could be observed when NADH concentration  
142 was increased from 35 to 125 μM. The variation of  $k_{app,u}$  value was observed to fall within  
143 2.5% at the concentrations of 125 and 250 μM. Thus it is preferred to perform PCA analysis

144 in the NADH concentration range of 125 ~ 250  $\mu\text{M}$ , where consistent values of  $k_{app,u}$  can be  
145 obtained to minimize the concentration effect of the substrate. From the above results, proper  
146 concentrations of the substrate and photocatalyst could be determined with regard to the  
147 linearity of the fluorescence intensity and the reaction rate.

148

#### 149 **S4. pH dependence of NADH photo-oxidation rate**

150 It has been reported that the substrate degradation by PCA is dependent on the pH of the  
151 suspension.<sup>5,6</sup> We determined the photo-oxidation rate of NADH in the presence of  $\text{TiO}_2$  at  
152 various pH values by monitoring the reaction in pH buffered suspensions. The pH of the  
153 suspensions was varied from 5 to 11 with interval of pH 1.

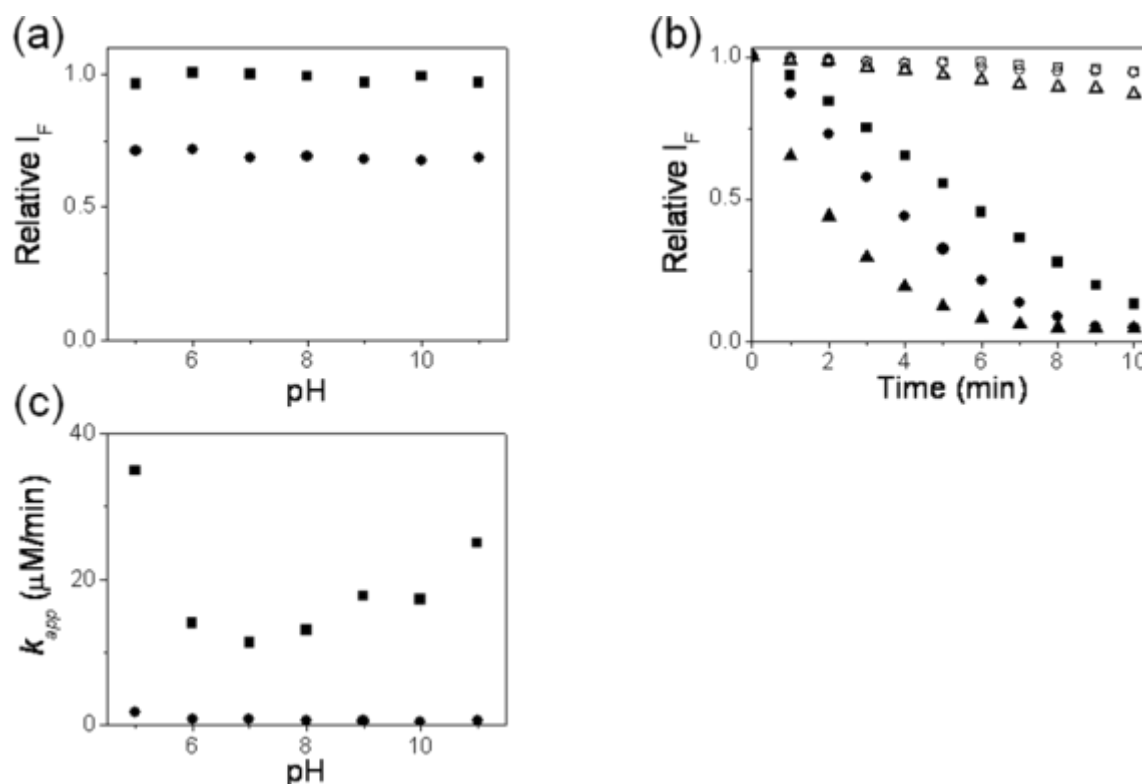

154 **Fig. S4.** (a) Relative fluorescence intensities of NADH normalized by the intensity of a pH 7  
155 NADH solution (125  $\mu\text{M}$ ) in the absence ( $\blacksquare$ ) and presence ( $\bullet$ ) of  $\text{TiO}_2$  NPs. (b) The decrease  
156 in the relative fluorescence intensity as a function of UV irradiation time in the absence (open  
157 symbol) and presence (closed symbols) of  $\text{TiO}_2$  NPs at various pH values. ( $\Delta$ ,  $\blacktriangle$ ) at pH 5, ( $\square$ ,  
158  $\blacksquare$ ) at pH 7, and ( $\circ$ ,  $\bullet$ ) at pH 10. (c) The dependence of the NADH photo-oxidation rate on the  
159 suspension pH in the absence ( $\bullet$ ) and presence of ( $\blacksquare$ )  $\text{TiO}_2$  NPs.

160



162 **Table S3** pH dependence of photo-oxidation rate constants

| pH | Photo-oxidation rate constant <sup>a</sup> ( $k_{app}$ ) |                       |
|----|----------------------------------------------------------|-----------------------|
|    | NADH only                                                | with TiO <sub>2</sub> |
| 5  | 1.70                                                     | 35.0                  |
| 6  | 0.846                                                    | 14.0                  |
| 7  | 0.754                                                    | 11.3                  |
| 8  | 0.654                                                    | 13.1                  |
| 9  | 0.500                                                    | 17.7                  |
| 10 | 0.476                                                    | 17.3                  |
| 11 | 0.648                                                    | 25.0                  |

163 <sup>a</sup>The unit of  $k_{app}$  is  $\mu\text{M}/\text{min}$ .  
164

165 The fluorescence spectrum of NADH was not altered by the change of pH in the  
166 range of pH 5 and pH 11. The degree of NADH fluorescence quenching by TiO<sub>2</sub> was also  
167 similar in the pH range of interest (Fig. S4(a)). This result shows that the NADH adsorption  
168 to the TiO<sub>2</sub> surface was not influenced by the pH of the suspension. The photo-oxidation rate  
169 of NADH without TiO<sub>2</sub> in solution slightly decreased from pH 5 to pH 10 exhibiting a very  
170 low rate constant and the rate increased again at pH 11 (Table S3 and Fig. S4(b)). However,  
171 the photo-oxidation rate of NADH in the presence of TiO<sub>2</sub> was greatly altered by the pH  
172 change in the suspension. The  $k_{app}$  value was modulated up to 3 fold during the pH change of  
173 the suspension from pH 5 (acidic) to pH 11 (basic) (Fig. S4(c)). Therefore, it is noted that the  
174 suspension pH should be defined using pH-buffered suspensions in the PCA analysis to  
175 obtain consistent results.  
176

### 177 ***S5. The dependence of NADH photo-oxidation rate on pH buffer ions***

178 We also observed an effect of the composition or the concentration of buffer ions on  
179 the PCA measurement. The photo-oxidation rate was not altered when the composition of the  
180 buffer ions was changed, but it was dependent on the concentration of the ions. When we  
181 performed PCA analysis in acetate and phosphate buffers of pH 6, the results agreed within  
182 0.7% (Fig. S5(a)). On the other hand, the photo-oxidation rate was modulated more than 2

183 fold by the change in the phosphate ion concentration at pH 8 (Fig. S5b). The reaction rate  
184 was decreased when the buffer concentration was increased from 1 to 50 mM and it increased  
185 again with an increase in the buffer concentration from 50 to 200 mM. From the above results,  
186 it is suggested that the buffer concentration and the pH of the suspension should be held in  
187 constant in the measurement of PCA using NADH photo-oxidation.

188

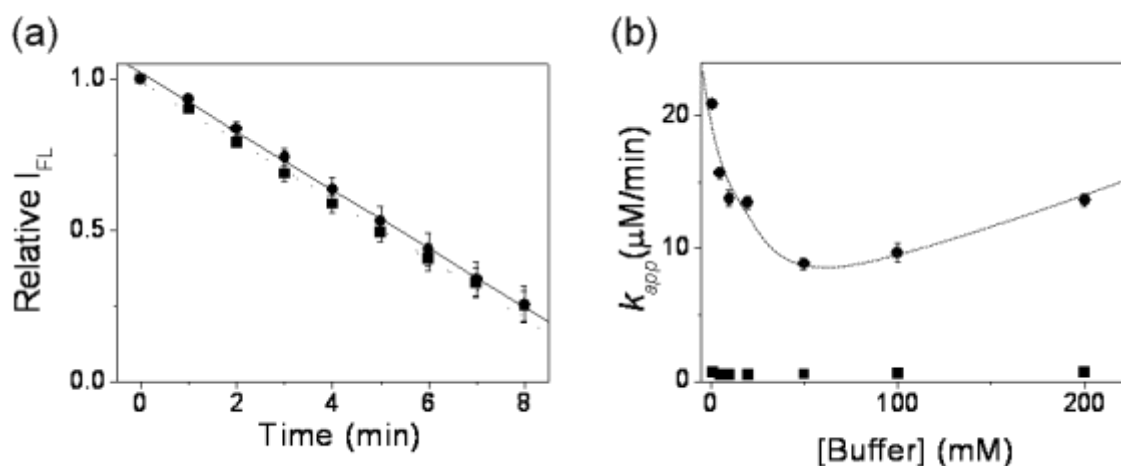

189

190 Fig. S5. (a) The decrease in the relative fluorescence intensity of NADH as a function of the  
191 UV irradiation time in the presence of  $\text{TiO}_2$  NPs at pH 6 adjusted using acetate (■) or  
192 phosphate (●) buffer. (b) The dependence of the NADH photo-oxidation rate on the  
193 concentration of pH buffer ions in the absence (■) and presence (●) of  $\text{TiO}_2$  NPs. (The dashed  
194 line is a simple auxiliary line for the presentation of tendency)

195

### 196 **S6. Photo-oxidation kinetics of NADH in the presence of $\text{TiO}_2$ NPs**

197 The photo-oxidation rate of NADH becomes higher in the presence of  $\text{TiO}_2$  NPs because  
198 various kinds of radicals and ROS can be generated on the surface of the NPs. The  
199 participation of ROS generated on the  $\text{TiO}_2$  surface in the photocatalytic oxidation of NADH  
200 could be observed through the PCA assay in the presence of ethanol, which is known to be a  
201 hydroxyl-radical scavenger.<sup>7</sup> The photo-oxidation rate of NADH in the presence of  $\text{TiO}_2$  was  
202 reduced by 34 % when 2.5 mM ethanol was added (Fig. S6).

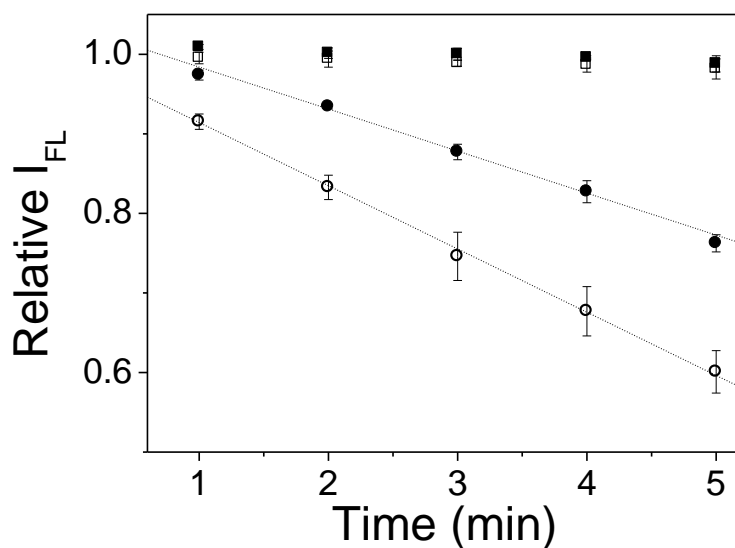

203

204 **Fig. S6.** The decrease in the relative fluorescence intensity as a function of UV irradiation  
 205 time in the absence (open symbol) and presence (closed symbols) of 2 mM ethanol as the  
 206 radical scavenger. (□, ■) 125 μM NADH solution, (○, ●) 125 μM NADH and 100 mg/L TiO<sub>2</sub>  
 207 suspension.  
 208

209 When UV light is applied, holes ( $h^+$ ) and electrons ( $e^-$ ) are generated on the surface  
 210 of TiO<sub>2</sub> as a result of photocatalytic activation.

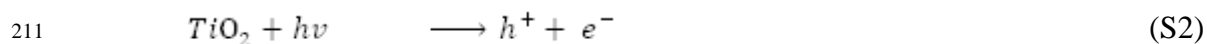

212 Holes and electrons generate hydroxyl-radical or superoxide by reaction with water,  
 213 hydroxide ion, or adsorbed molecular oxygen to oxidize NADH.<sup>5, 8-11</sup>

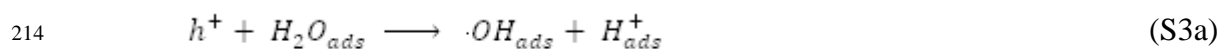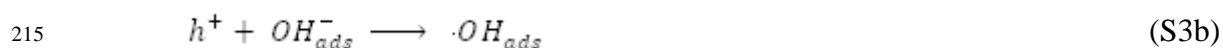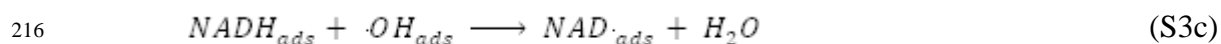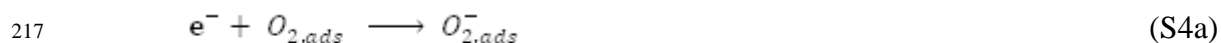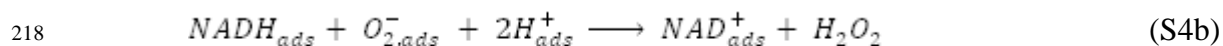

219 Here, the subscript 'ads' indicates the species adsorbed on the surface of TiO<sub>2</sub> NPs.

220 The dependence of the NADH photo-oxidation rate on the suspension pH can be  
221 explained by the above suggested reaction mechanisms. In the suspension of pH 7, ROS are  
222 generated *via* the reactions in Eqns (S3a) and (S4a); however, ·OH generation becomes more  
223 effective in basic suspensions (pH > 7) through the reaction in Eqn (S3b). This process was  
224 expressed as an increased rate of NADH photo-oxidation along with the increase of  
225 suspension pH. On the other hand, the reaction of NADH with  $O_2^-$  in Eqn (S4b) becomes  
226 faster in acidic suspensions (pH < 7) due to the increased concentration of the adsorbed  
227 aqueous protons (Fig. S4(c)).

228

## 229 References for Supporting Information

- 230 1. J. R. Lakowicz, *Principles of Fluorescence Spectroscopy*, Springer, New York, 1999.
- 231 2. W. J. E. Beek and R. A. J. Janssen, Photoinduced electron transfer in  
232 heterosupramolecular assemblies of TiO<sub>2</sub> nanoparticles and terthiophene carboxylic  
233 acid in apolar solvents, *Adv. Funct. Mater.*, 2002, **12**, 519-525.
- 234 3. A. Kathiravan and R. Renganathan, Interaction of colloidal TiO<sub>2</sub> with bovine serum  
235 albumin: A fluorescence quenching study, *Colloid Surface A*, 2008, **324**, 176-180.
- 236 4. C. M. Samworth, M. D. Esposti and G. Lenaz, Quenching of the intrinsic tryptophan  
237 fluorescence of mitochondrial ubiquinol—cytochrome-c reductase by the binding of  
238 ubiquinone, *Eur. J. Biochem.*, 1988, **171**, 81-86.
- 239 5. N. Daneshvar, M. Rabbani, N. Modirshahla and M. A. Behnajady, Kinetic modeling  
240 of photocatalytic degradation of Acid Red 27 in UV/TiO<sub>2</sub> process, *J. Photochem.*  
241 *Photobiol. A: Chem.*, 2004, **168**, 39-45.
- 242 6. A. R. Rahmani, M. T. Samadi and A. Enayati Moafagh, Investigation of  
243 photocatalytic degradation of phenol by UV/TiO<sub>2</sub> process in aquatic solutions, *J. Res.*  
244 *Health Sci.*, 2008.
- 245 7. M. Suthanthiran, S. D. Solomon, P. S. Williams, A. L. Rubin, A. Novogrodsky and K.  
246 H. Stenzel, Hydroxyl radical scavengers inhibit human natural killer cell activity,  
247 *Nature*, 1984, **307**, 276-278.
- 248 8. T. Daimon and Y. Nosaka, Formation and behavior of singlet molecular oxygen in  
249 TiO<sub>2</sub> photocatalysis studied by detection of near-infrared phosphorescence, *J. Phys.*  
250 *Chem. C*, 2007, **111**, 4420-4424.
- 251 9. K.-i. Ishibashi, A. Fujishima, T. Watanabe and K. Hashimoto, Generation and  
252 deactivation processes of superoxide formed on TiO<sub>2</sub> film illuminated by very weak  
253 UV light in air or water, *J. Phys. Chem. B*, 2000, **104**, 4934-4938.
- 254 10. T. A. Konovalova, J. Lawrence and L. D. Kispert, Generation of superoxide anion and  
255 most likely singlet oxygen in irradiated TiO<sub>2</sub> nanoparticles modified by carotenoids, *J.*  
256 *Photochem. Photobiol. A: Chem.*, 2004, **162**, 1-8.
- 257 11. S. Xu, J. Shen, S. Chen, M. Zhang and T. Shen, Active oxygen species ( $^1O_2$ ,  $O_2^{\cdot-}$ )  
258 generation in the system of TiO<sub>2</sub> colloid sensitized by hypocrellin B, *J. Photochem.*  
259 *Photobiol. B: Biol.*, 2002, **67**, 64-70.
